# 1 “Just Saiyan: Tail-trimming Human Monkeypox Virus Assemblies 2 Emphasizes Resolvable Regions in Inverted Terminal Repeats to 3 Improve the Resolution of Reference and Production Genomes 4 for Genomic Surveillance.” 5

## 6 Author

7 Alejandro R. Gener, PhD<sup>1</sup>  
8

## 9 Affiliation

10 <sup>1</sup>Association of Public Health Laboratories, Silver Spring, MD, USA  
11

12 Contact: [itspronouncedhenner@gmail.com](mailto:itspronouncedhenner@gmail.com)

13 Downey, Los Angeles County, California, USA.  
14

## 15 Abstract:

16 Our ability to track the spread of the human monkeypox virus (hMPXV) during the ongoing  
17 monkeypox (hMPX) outbreak of 2022 relies on the availability of high-quality reference genomes.  
18 However, the way the information content of these genomes is organized in genome databases leaves  
19 room for interpretation. A current limitation of hMPXV genomic analysis is that the variability occurring  
20 in the inverted terminal repeats (ITRs) cannot be effectively resolved. This is because of shortcomings of  
21 the leading short-read sequencing and reference-guided assembly and variant calling used in the  
22 ongoing global hMPXV outbreak surveillance effort. Here I propose ITR tail-trimming, a simple no-cost  
23 reframing of how we organize hMPXV reference genomes and future assemblies. This approach is based  
24 on long terminal repeat (LTR) tail-trimming, which is a common practice in HIV sequence analysis. The  
25 main point of repeat sequence trimming is to remove problematic sequences while paying attention to  
26 limitations of mapping and variant calling in remaining repeat-associated (but ideally no longer  
27 repetitive) sequence. ITR tail-trimming would neutralize ITRs as distracting features at the read- and  
28 assembly-levels, allowing the global community to focus our efforts to track variability across hMPXV  
29 genomes.

## 30 Key words:

31 human monkeypox virus, phasing, linear reference genome, inverted terminal repeat, LTR tail-trimming,  
32 ITR tail-trimming

## 33 Introduction

34 The ongoing monkeypox (hMPX) **outbreak** of 2022 (WHO, 2022) coincided with unprecedented  
35 global genomic surveillance networks able to contribute to publicly available monkeypox virus (hMPXV)  
36 genome assemblies. Our ability to diagnose infection and to track the spread of this emerging pathogen  
37 relies on the availability of high-quality genomes. However, the way the information content of these  
38 genomes is organized in genome databases leaves room for interpretation. Specifically, sequence data  
39 of inverted terminal repeats (ITR) with effectively identical internal sequence are often not  
40 unambiguously callable (phasable) because sequencing reads are often much shorter than the 6.5kb~  
41 hMPXV ITRs ([Figure 1: hMPXV ITRs](#)).

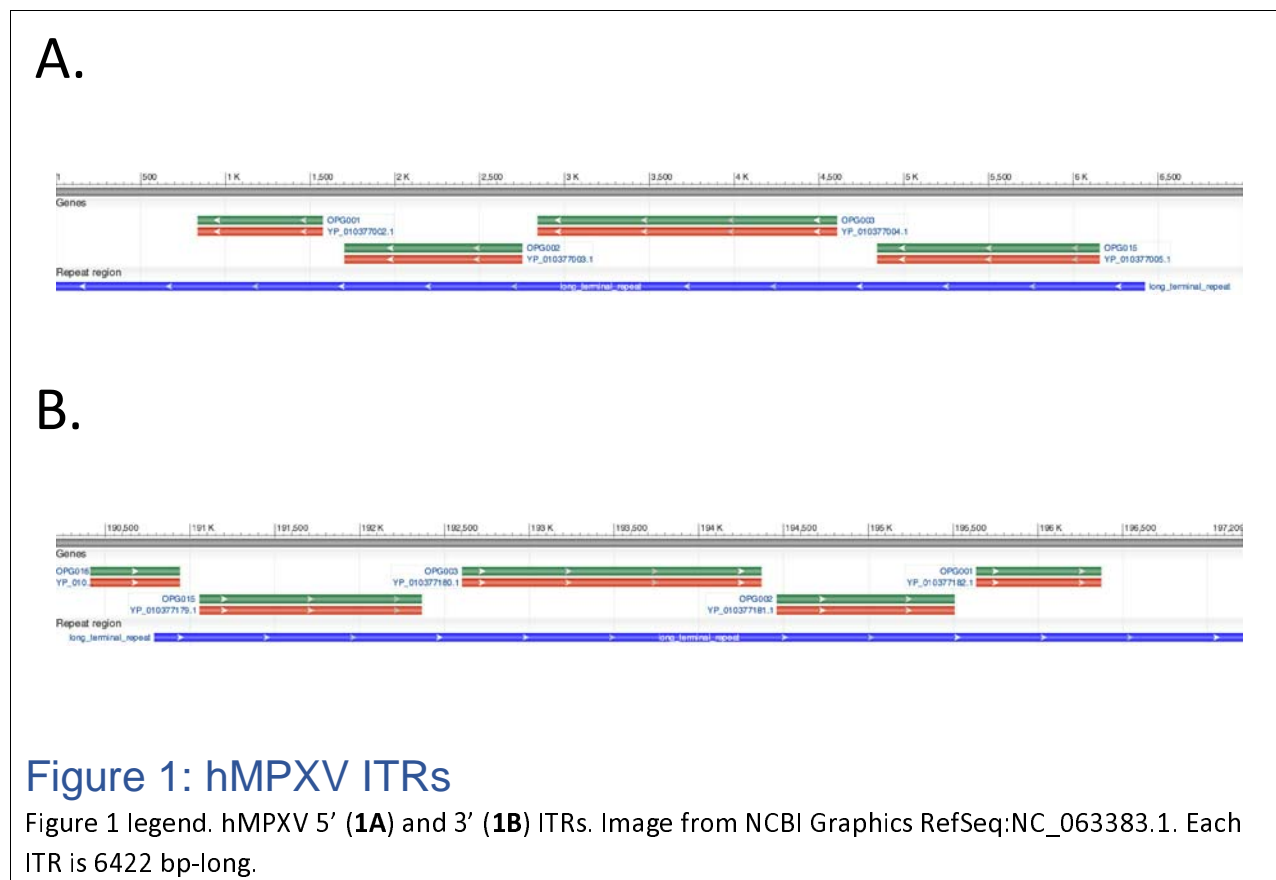

42

## 43 Figure 1: hMPXV ITRs

44 Figure 1 legend. hMPXV 5' (**1A**) and 3' (**1B**) ITRs. Image from NCBI Graphics RefSeq:NC\_063383.1. Each  
45 ITR is 6422 bp-long.

46 Reference genomes and production genomes for hMPXV are organized as non-ITR sequence  
47 sandwiched between two complete ITRs (e.g., 5'ITR-body-3'ITR). hMPXVs are closely related DNA  
48 viruses with relatively low mutation rates ( $10^{-5}$  to  $10^{-6}$  per site) ((ViralZone, 2022); (Kerr et al., 2012)). For  
49 perspective, the current hMPXV outbreak's reference genome RefSeq:NC\_063383.1 (Clade IIb, formerly  
50 "West African" (Happi et al., 2022)) is 197,209 bases long. Early cases from the current 2022 hMPX  
51 outbreak had less than 10 acquired mutations compared to GenBank:MT903343 (Gigante et al., 2022).  
52 This is consistent with what was seen in an earlier 2017 hMPX outbreak in which authors noted  
53 mutation burdens as low as 0.4-1.5 single nucleotide polymorphisms per genome in a given transmission  
54 chain (Mauldin et al., 2022). Given the low mutation rate and low cluster divergences, care must be  
55 taken to rule out sequencing error to be able to assess genomes from suspected cluster cases.

56 The monkeypox-specific primers in use by the CDC are anchored in the ITRs (CDC Poxvirus &  
57 Rabies Branch (PRB), 2022). As of 9/2/2022, the current CDC-recommended MPXV-specific primers  
58 overlap the OPG002 gene. However, use of ITRs is risky as a sole hMPXV-specific target because of the  
59 potential for internal sequence heterogeneity to obscure ITR sequence and possibly structure (Gubser &  
60 Smith, 2002).

61 ITRs are also important in part because they harbor protein-coding genes. In order from the  
62 current assembly's 5' start site: OPG001, OPG002, OPG003, OPG015. The OPG001 gene produces  
63 MPXVgp001/ Chemokine binding protein (Cop-C23L) and is annotated in the Reference Sequence  
64 (RefSeq) record to be the most abundantly expressed secreted MPXV protein. The OPG002 gene product  
65 NBT03\_gp002/ CrmB is a TNF-alpha-receptor-like protein. The OPG003 gene makes MPXVgp003/Ankyrin  
66 repeat protein (25). The OPG015 gene makes MPXVgp004/Ankyrin repeat protein (39).

67 In a recent presentation on June 22, 2022, Dr. Gustavo Palacios of Icahn School of Medicine at  
68 Mount Sinai suggested in passing that the hMPXV ITR could be either excluded from posterior analysis  
69 or treated as one copy. hMPXV ITRs may obscure mapping of short-reads depending on how internal  
70 repeats are arranged. Others noted that poxviruses can have repetitive low complexity regions in their  
71 ITRs (Gubser & Smith, 2002). These had been seen to some extent in hMPXV sequences, framed in the  
72 language of short tandem repeats (STR) in monkeypox viruses (Kugelman et al., 2014). An open question  
73 was whether these kinds of repetitive sequences occurred in hMPXV ITRs during the current outbreak,  
74 and whether these could interfere with mapping of the kinds of reads that were currently being used to  
75 help assemble hMPXV genomes.

76 Regardless of STRs, variability within ITRs is currently obscured, or camouflaged (*Ebbert et al.,*  
77 *2019*), preventing simpler haploid/single-copy mapping and variant analysis. Their display as full-length  
78 inverted copies may be problematic depending on the sequencing platform used to make the  
79 assemblies. Nanopore (Oxford Nanopore Technologies; ONT) platforms are more flexible in their input  
80 and may receive as input direct/native DNA (PCR-free; not including multiplexing) or amplicon. On  
81 9/4/22 there were no hMPXV assemblies made with PacBio instruments in NCBI. (Search term used:  
82 "(Monkeypox virus"[Organism] OR "monkeypox virus"[All Fields]) AND pacbio[All Fields]".) For higher-  
83 throughput Illumina (ILM) platforms (e.g., NovaSeq 6000), the chemistry is optimized for paired-end 150  
84 base-long and an insert size (total DNA piece length) around 300 bases if using paired-end sequencing.  
85 Other common ILM platforms use PE150 and similar insert sizes too. So, identified variability beyond the  
86 300-base ITR threshold is unlikely to be resolvable to either IT. In other words, variants within deeper  
87 "tails" are not phasable, though they may be identified in read data and may make it into assemblies  
88 depending on the allele frequency thresholds used to call variants.

89 Here I propose ITR tail-trimming, a simple no-cost reframing of how we organize hMPXV  
90 reference genomes and future assemblies which would neutralize ITRs as distracting features at the  
91 read- and assembly-levels, allowing the global community to focus our efforts to track variability across  
92 the hMPXV genome. This process has been employed implicitly for HIV RNA sequencing analyses and  
93 may benefit the hMXP/hMPXV research communities during the ongoing outbreak.

## 94 Results and Discussion

### 95 HIV LTRs are repeat sequences that set a precedent for trimming

96 Prior to the current hMPX outbreak and coronavirus pandemic, the most studied human  
97 pathogen was HIV-1. As such, insights from HIV-1 genomics may be transferable to other virus pathogen  
98 systems such as MPXV.

99 The HIV-1 genome was originally represented as a DNA provirus that was captured by restriction  
100 cloning into a molecular clone/plasmid (Gener et al., 2021). This enabled subsequent molecular  
101 biological dissection of the virus, which is still ongoing after 37+ years (Gener, 2022). Prominent  
102 structural features of HIV proviruses include long terminal repeats (LTRs) ([Figure 2A](#)) (Starcich et al.,  
103 1985) (Krebs et al., 2001).

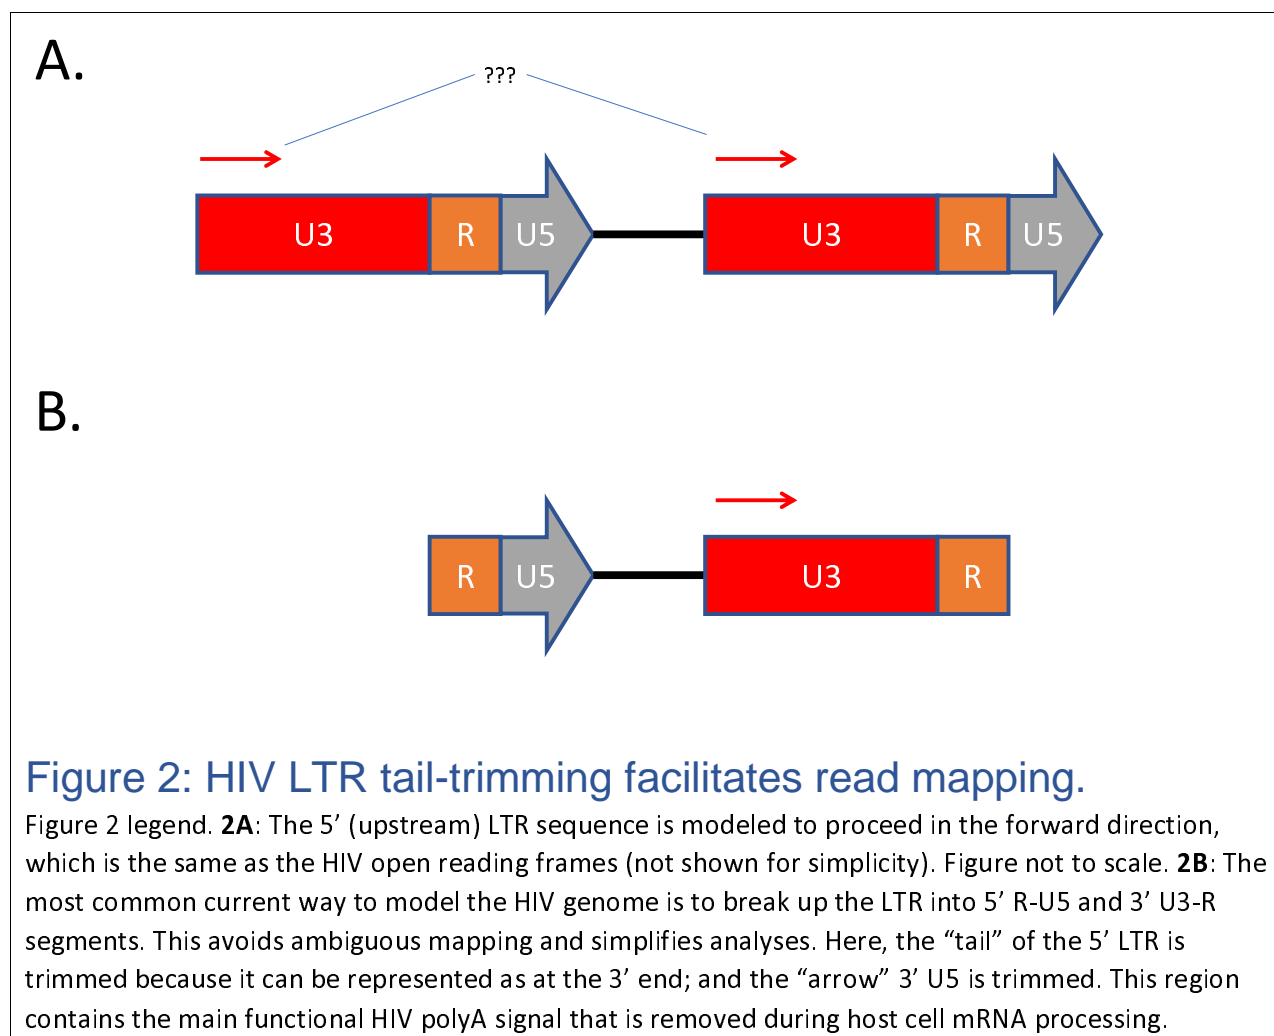

112 HIV LTRs are large (~640 bp) proviral genomic features analogous to hMPXV ITRs. HIV LTRs occur  
113 in identical (arbitrarily forward) orientation, flank the 5' (head) and 3' (tail) ends of the full-length  
114 unspliced replication-competent provirus. These LTRs were longer than the many iterations of short-  
115 read sequencing, increasing from 50, 75, 150 (less commonly >250) single-end and 150 (less commonly  
116 >250) paired-end Illumina sequencing by synthesis (Shendure et al., 2017). Other sequencing methods

117 like Sanger sequencing or ion torrent, or newer ILM methods could increase read lengths to nearly LTR-  
118 length reads. However, the LTR lengths and additional sequence complexity represent a current  
119 approximate limit of performance for amplifying these features in different kinds of clinical or research  
120 samples and then sequencing with the available technologies of the time.

121 HIV-1 genomes are modeled differently depending on the reference accession, and whether the  
122 intent is to model the proviral DNA form or the viral mRNA form. The main reference genome used by  
123 the Los Alamos National Laboratory's HIV Sequence Database is HXB2 GenBank: K03455.1, which was  
124 recently physically re-sequenced (Gener et al., 2021) and verified as a legitimate provirus with identical  
125 flanking LTRs. This sequence is important because all downstream analyses in the HIV Sequence  
126 Database are based either directly or indirectly on this historical species-specific reference.

127 With the advent of RNA-sequencing (Stark et al., 2019), it became convenient to represent the  
128 information contained in HIV differently. Today, the information contained in the HIV genome is now  
129 most often modeled as a full-length unspliced mRNA viral genome, with varying degrees of sequence  
130 annotation (e.g. RefSeq: NC\_001802.1 gold-standard NCBI reference sequence; GenBank:MZ242719.1  
131 with newer splice-associated open reading frames (GENERs) (Gener, 2022)). In this representation, the  
132 HIV LTRs were broken up at a leading small ~100 bp R repeat ([Figure 2](#)). Multiple mapping is thus  
133 minimized for reads longer than 100 bp.

134 The main point of repeat sequence trimming is to remove problematic sequences while paying  
135 attention to limitations of mapping and variant calling in remaining repeat-associated (but ideally no  
136 longer repetitive) sequence. HIV as a system is an example where repeat sequence trimming (tail-  
137 trimming) has been adopted with minimal fuss.

## 138 Sequencing and analysis considerations

139 In addition to considering the known biology of pathogens such as HIV or hMPXV, attention  
140 should be paid to the wet lab protocols used to generate sequencing data, and the planned analysis(es)  
141 which may depend on protocol used.

142 Reads can map to more than one place if there are repetitive sequences in a reference genome.  
143 Two relevant terms are secondary and supplemental alignments. These are described well in the  
144 documentation for a commonly used genome visualization tool the Integrative Genomics Viewer  
145 (Robinson et al., 2011), and are pasted here for clarity:

- 146 1. "A read may map ambiguously to multiple locations, e.g. due to repeats. Only one of the  
147 multiple read alignments is considered primary, and this decision may be arbitrary. All other  
148 alignments have the **secondary** alignment flag." In this case, the entire read can map to  
149 multiple locations as in hMPXV ITRs. Source:  
150 <https://software.broadinstitute.org/software/igv/book/export/html/6> on 01 September  
151 2022.
- 152 2. "A chimeric alignment that is represented as a set of linear alignments that do not have  
153 large overlaps typically has one linear alignment that is considered the representative  
154 alignment. Others are called **supplementary** and have a supplementary alignment flag."  
155 Source: <https://software.broadinstitute.org/software/igv/book/export/html/6> on 01  
156 [September 2022](#).

157           Importantly, secondary/supplemental alignments need not be mutually exclusive. As repeats are  
158 difficult or impossible to unambiguously place (phase) given common short-read approaches, many  
159 genomic workflows include a repeat masking step to remove large low-complexity sequence from  
160 consideration while preserving assembly length. Repeat masking could solve the hMPXV ITR problem(s).  
161 However, this region is critical for current monkeypox-specific diagnostics. It also contains several  
162 protein-coding genes as mentioned above, including the allegedly most abundantly secreted OGP001  
163 gene product. As such, it might benefit the global surveillance effort to monitor and track any changes in  
164 this region.

165           As for library considerations, it is important to consider the most common sequencing platforms  
166 available to most end-users in the sectors performing hMPX/hMPXV. Both long- and short-reads  
167 sequencing are currently used for most high-priority pathogens with large genomes. This includes  
168 hMPXV. Rather than focusing on which technology is better, different members of the community have  
169 used both to varying degrees during earlier surveillance during the 2022 outbreak (summarized in [Table](#)  
170 [1](#)). Besides which platform(s) were used in each setting, earlier assemblies leverages both *de novo* and  
171 reference guided approaches. Competing priorities of quick assemblies with platform-specific errors  
172 were augmented with resequencing and either *de novo* short-read from reference-filtered data or  
173 hybrid assembly approaches.

174 **Table 1: protocols/papers for hMPXV genome assembly**  
175

|                  | Long-read                                                    | Short-read                                                   |
|------------------|--------------------------------------------------------------|--------------------------------------------------------------|
| <i>De novo</i>   | (Alcoba-Florez et al., 2022)*<br>(Gigante et al., 2022)*, ** | (Alcoba-Florez et al., 2022)*<br>(Gigante et al., 2022)*, ** |
| Reference-guided |                                                              | (Chen et al., 2022)                                          |

176

177 Table 1 legend: \*Hybrid assembly approaches employ both long and short reads. \*\*Reference hMPXV  
178 genomes (e.g., GenBank:MT903343) may be used to prioritize hMPXV-mapping reads for *de novo*  
179 assembly.

180           Regardless of assembly approach, resulting assemblies must be compared to available high-  
181 quality references to be able to call variants. Variant calling is a distinct process after either *de novo*  
182 assembly or consensus calling after mapping to a reference (*i.e.*, reference-guided assembly). Because  
183 poxviruses have such low error rates, references were carefully made, and their quality assessed with  
184 orthogonal methods. For production-level (*i.e.*, day-to-day) hMPXV assemblies, the accuracy of each  
185 assembly needs to be balanced with sequencing throughput to be able to adequately survey the number  
186 of cases seen during the present outbreak. In this context, because ILM sequencers are already present  
187 in many US public health labs already doing other routine pathogen surveillance, short-read reference-  
188 guided assembly is most used for hMPXV genomic surveillance. Other platforms such as ONT or Clear  
189 Labs (which uses ONT as part of a proprietary robotic and analytical solution) are also available in some  
190 public health and research settings across the local, state, and national level in the US.

191

192 ITR problems and ITR tail-trimming proposal

193 The complete representation of terminal repeats has a time and a place. Where sequencing  
194 methods fall short, additional sequence can be distracting and cause problems (Figure 3A-C) that the  
195 current predominant public health workflows are not equipped to handle unambiguously.

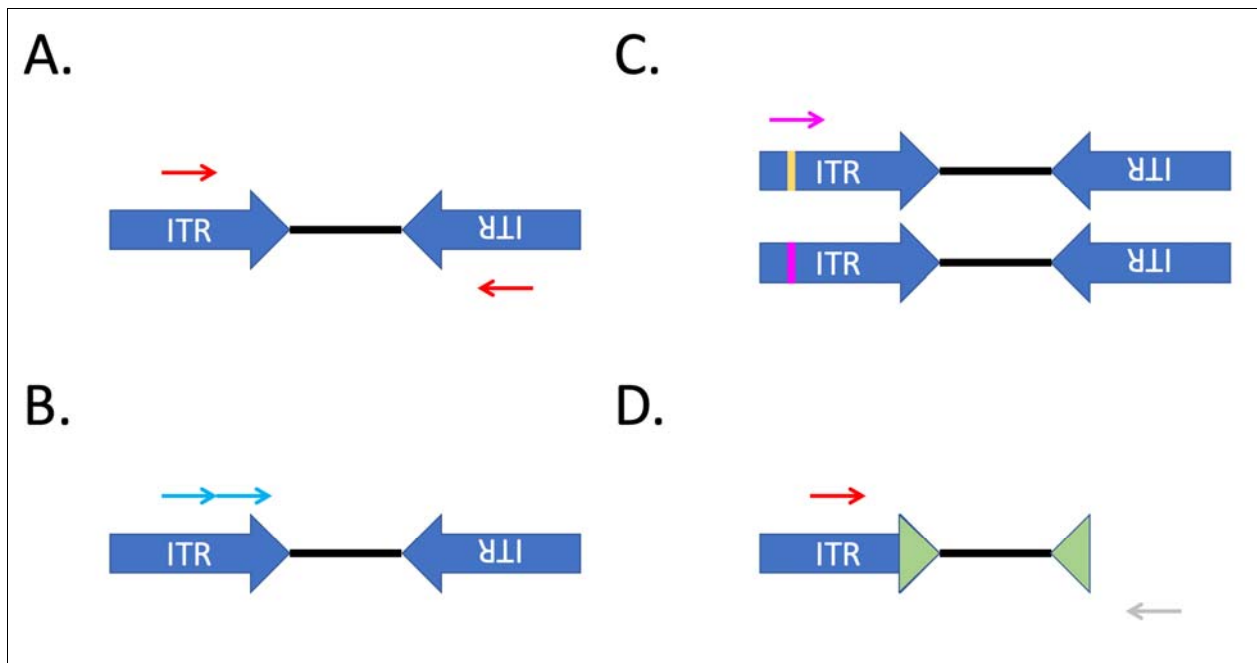

196

197 **Figure 3: Problems inherent to hMPXV ITR sequence analysis,**  
198 **and a possible solution**

199 Figure 3 legend. **3A: Inter-ITR mapping.** Reads (thin red arrow) from ITR sequence (large blue arrow)  
200 cannot be phased unless they are anchored to non-ITR sequence. This can happen with 1.) reads longer  
201 than either ITR or 2.) reads with downstream/upstream non-ITR sequence with bridging contiguous  
202 sequence running into the ITR. Neither 1 or 2 are shown to emphasize the current state of most hMPXV  
203 public health sequencing. Red arrows denote secondary alignments. Note that the absolute orientation  
204 of arrows are arbitrary. For example, NCBI displays them as <-...->. This is likely because most of the  
205 open reading frames in the ITR occur in the direction of the arrow. An important relationship of the ITR  
206 sequences is that each ITR is inverted relative to the other. Reads/ITR not show to scale. **3B: Intra-ITR**  
207 **mapping.** This was not an issue after kmer analysis if using PE150 and insert size ~300 bp (negative  
208 results not shown). **3C:** Either ITR might inherit a mutation, which then must be distinguished between  
209 its upstream or downstream counterpart. Repeat DNA extraction and resequencing can help to resolve  
210 allelic artifactual heterogeneity. Note that most genomic surveillance performed in public health  
211 settings is done as single runs. Technical duplicates are not routinely done in public health labs. Higher  
212 capacity labs may reextract and resequence samples for quality. **3D:** I propose hMPXV assembly ITR tail-  
213 trimming (tail-trimming for short), which has 2 parts. Firstly, trimming (removing or deleting) the  
214 sequence downstream of the first ~300 bp of the 3' LTR (right green arrow). Secondly, annotating the  
215 medial ~300 bp of the 5' ITR and remaining (also medial) 3' ITR as phasable, while annotating the tail or

216 distal segment of the of the 5' ITR as conditionally phasable, where read length and sequencing depth  
217 determine phasability. See "Data availability" section below for specifics.

218 Problems relevant to hMPXV ITRs might include: resolving inter-ITR mapping ([Figure 3A](#)) and/or Intra-  
219 ITR mapping ([Figure 3B](#)). A third problem might occur ([Figure 3C](#)) when either ITR might appear to  
220 acquire a mutation, which then must be distinguished between its upstream or downstream  
221 counterpart. As a solution to the above problems, I propose hMPXV assembly ITR tail-trimming (tail-  
222 trimming for short; [Figure 3D](#)), which has 2 parts. Firstly, trimming (removing or deleting) the sequence  
223 downstream of the first ~300 bp of the 3' LTR (right green arrow). Secondly, annotating the medial ~300  
224 bp of the 5' ITR and remaining (also medial) 3' ITR as phasable, while annotating the tail or distal  
225 segment of the of the 5' ITR as conditionally phasable, where read length and sequencing depth  
226 determine phasability. See "[Data availability](#)" section below for specifics.

227 As a proof-of-principle, I took reads from a public hMPXV sample (BioSample:SAMN30416950;  
228 run accession SRR21143274) collected on 25 July 2022 and recently sequenced (submitted to SRA on 19  
229 August 2022) and mapped these to NC\_063383.1 (untrimmed) and NC\_063383.1\_tt (ITR tail-trimmed)  
230 assemblies ([Figure 4](#)).

231 **Figure 4: ITR tail-trimming mitigates secondary alignments**

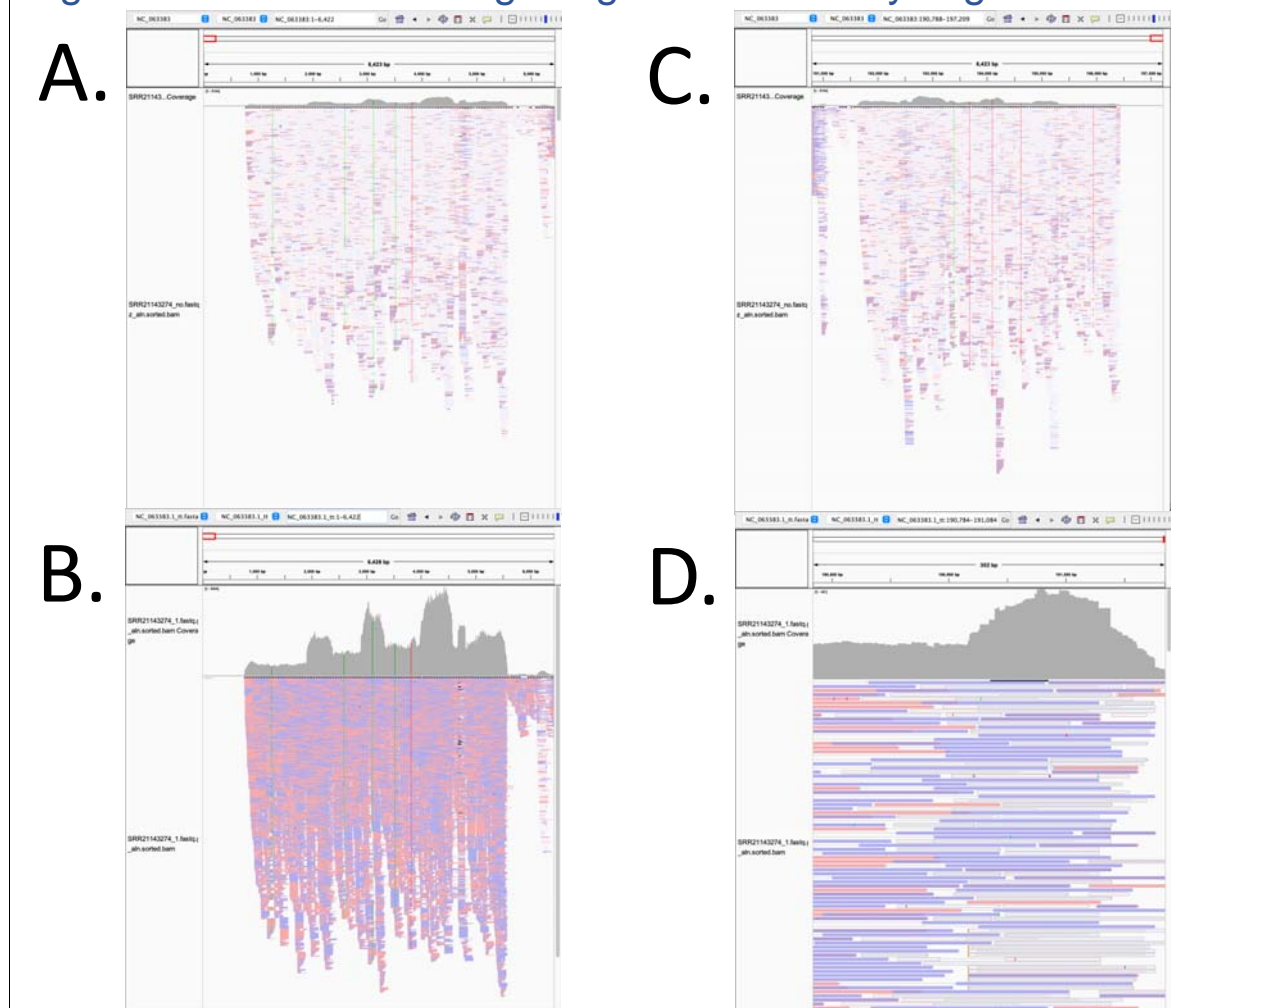



233 Figure 4 legend. The following MPXV WGS sequencing data was used as an example due to its high  
234 coverage over the ITRs: CA-LACPHL-M10162\_081822\_5x\_01 of BioSample:SAMN30416950; run  
235 accession SRR21143274. This was submitted by Los Angeles County Public Health Lab microbial  
236 pathogen submission group (LACPHL) under BioProject:PRJNA864832. Minimap2 (Li, 2018) was used to  
237 remap SRR21143274 reads to NC\_063383.1 or to a tail-trimmed NC\_063383.1 “NC\_063383.1\_tt.fasta.”  
238 Samtools (Wysoker et al., 2009) was used to prepare for visualization in IGV. Windows shown  
239 correspond to ITR segments only. Reads are colored based on their orientation: salmon = forward; violet  
240 = reverse. Single nucleotide polymorphisms are represented by green and red vertical stripes. **4A:**  
241 SRR21143274 remapped to NC\_063383.1 5' ITR. Note the abundant pale reads. **4B:** SRR21143274  
242 remapped to NC\_063383.1 3' ITR. Note the abundant pale reads. **4C:** SRR21143274 mapped to  
243 NC\_063383.1\_tt 5' ITR. Squished. Coverage is lower near the downstream 5' ITR. **4D:** SRR21143274  
244 mapped to NC\_063383.1\_tt 3' ITR. Collapsed. Several reads mapped to upstream of the window.  
245 Supplemental alignments are minimized. Note that the range of the phasable segments can be extended  
246 depending on the insert size and/or platforms (e.g., average read length). Note that variants identified in  
247 are not within the phasable segments of the ITR.

248 For this sample, ITR tail-trimming was able to mitigate most of the secondary mapping. Recalling that  
249 ITR reads and any variants distal to the proximal ~300 bp would not be able to be phased. However,  
250 they could at least be displayed together and analyzed separately from the phasable hMPXV genome.

251 Tail-trimmed reference assemblies ([Figure 2B](#), [Figure 3D](#), [Figure 4](#)) would better meet the  
252 current needs of all amplicon-based assembly and variant calling workflows for hMPXV. Because this is  
253 an analytical method, ITR tail-trimming would not disrupt current wet lab protocols. As such, it  
254 approximates *gratis*. ITR tail-trimming facilitates ITR inspection and ergo tracking ITR change over time  
255 which might impact current hMPX-specific diagnostics. This hack may be extensible to other poxviruses  
256 and to other viruses with terminal repeats that are longer than the reads used to interrogate sequenced  
257 samples.

258 Besides manual inspection, community resources may leverage this method to follow variability  
259 in previously underappreciated ITRs. A major open sequence analysis webserver caller Nextclade  
260 (Aksamentov et al., 2021) does not currently explicitly include non-coding sequences in their gene-  
261 specific dropdowns. This is in part because this tool is not meant to be an explicit genome viewer (as  
262 opposed to IGV, the US National Center for Biotechnology Information (NCBI)'s Graphics view of the  
263 reference genome nucleotide records, UCSC genome browser (which pulls from the  
264 RefSeq:NC\_063383.1), others). Until ITR tail-trimming is adopted widely and until noncoding regions are  
265 included explicitly by Nextclade (if curators choose to include them), Nextclade does display OPG001,  
266 OPG002, OPG003, and OPG015, which serves as a proxy to direct ITR observation. However, because  
267 these genes occur on repeat elements, their variant calling and Nextclade flags are subject to  
268 misinterpretation. This is not obvious unless one is aware of the nature of repeats generally (as above)  
269 and unless one takes the time to appreciate these elements and analyze them appropriately. This is  
270 mentioned without judgement, but with encouragement to redress the issue for public health  
271 community members studying this emerging global pathogen. With ITR tail-trimming and segment  
272 annotation, these regions and open reading frames can be effectively flagged and subsequently handled  
273 appropriately as diploid depending on the methods used to generate reads. Deviation from reference(s)  
274 can be more easily appreciated and followed if/when it occurs.

275           Implementing hMPXV genomic tail-trimming by treating diploid ITRs as conceptually distinct  
276 from single-copy haploid non-ITR hMPXV sequence may help focus surveillance efforts at these  
277 problematic regions. Importantly, ITR tail-trimming does not preclude using both full-length 5' and 3'  
278 ITRs when reads are long enough to extend the phasable sequence (green arrows in [Figure 3D](#)). In the  
279 time that it takes for longer-read sequencing and/or metagenomic sequencing to be adopted, methods  
280 to improve interpretation and limitations of sequence analysis may aid in the ongoing hMPX/hMPXV  
281 genomic surveillance effort.

282

## 283 Data availability

284 The phasable segments of the hMPXV include the following sequences which occur twice (once  
285 at the 5' ITR and then the reverse-complement toward the 3' ITR; 2x total) in the current  
286 implementation of NC\_063383.1:

287 >phasable\_ITR\_segment\_NC\_063383.1

```
288 GCTCATCGACAGCCATGAAATCTACCGACTCCATGGTGCGAATCGCACTGTCTTATTCGCCATTGATTTT  
289 CATTTCATATAATTATGTACATGTTTCCTTCTATTCTCAAGAGTCTACAAAAATATATTTTTTCGATAT  
290 CTAAGTACTAAGTTTTTTTACTGTTTTTGTACTGTCTTCCATTCTTCTAACTAAAGATCTGAGATAAAT  
291 TATACAATCTTCGCTATCGAACCATTTTTGTAGTCTAAAGCCTGAAGTAATTAACCAACTGTTTTTTATTA  
292 GTGGCTTTTTTCGATCTATC
```

293 //

294 I propose annotating the upstream 1..6122 (base-1; inclusive) of the 5' ITR as the conditionally phasable  
295 segment, and tail-trimming the terminal 6122 bases of the 3' ITR to simplify genomic analyses. This  
296 assumes PE 150, and that reads longer than average insert of 300 should help phase reads to their  
297 respective poles.

## 298 Funding

299 This work was supported by Cooperative Agreement Number NU60OE000104-02, funded by the  
300 Centers for Disease Control and Prevention through the Association of Public Health Laboratories. Its  
301 contents are solely the responsibility of the author and do not necessarily represent the official views of  
302 the Centers for Disease Control and Prevention or the Association of Public Health Laboratories.

## 303 Conflict of interest statement

304 I have received travel support in the form of poster bursaries from Oxford Nanopore  
305 Technologies, Oxford, UK. I am on the editorial board of *AIDS*.

## 306 Acknowledgements

307 I would like to sincerely thank the curators in NCBI, Nextstrain, and other pathogen sequence  
308 databases who have maintained their respective databases. I would also like to thank members of the  
309 SPHERES and Staph-B communities for their invaluable discussions. It takes a village.

310

## 311 References:

- 312 Aksamentov, I., Roemer, C., Hodcroft, E., & Neher, R. (2021). Nextclade: clade assignment, mutation  
313 calling and quality control for viral genomes. *Journal of Open Source Software*, 6(67), 3773.  
314 <https://doi.org/10.21105/joss.03773>
- 315 Alcoba-Florez, J., Muñoz-Barrera, A., Ciuffreda, L., Rodríguez-Pérez, H., Rubio-Rodríguez, L. A., Gil-  
316 Campesino, H., Artola, D. G.-M. de Í.-C., Díez-Gil, A., González-Montelongo, O., Valenzuela-  
317 Fernández, R., Lorenzo-Salazar, A., & M.José Flores, C. (2022). A draft of the first genome sequence  
318 of Monkeypox virus associated with the multi-country outbreak in May 2022 from the Canary  
319 Islands, Spain. *Virological*, 864. [https://virological.org/t/a-draft-of-the-first-genome-sequence-of-  
320 monkeypox-virus-associated-with-the-multi-country-outbreak-in-may-2022-from-the-canary-  
321 islands-spain/864](https://virological.org/t/a-draft-of-the-first-genome-sequence-of-monkeypox-virus-associated-with-the-multi-country-outbreak-in-may-2022-from-the-canary-islands-spain/864)
- 322 CDC Poxvirus & Rabies Branch (PRB). (2022). *Test Procedure: Monkeypox virus Generic Real-Time PCR*  
323 *Test*.
- 324 Chen, N. F. G., Gagne, L., Doucette, M., Smole, S., Buzby, E., Hall, J., Ash, S., Harrington, R., Cofsky, S.,  
325 Clancy, S., Kapsak, C. J., Sevinsky, J., Libuit, K., Chaguza, C., Grubaugh, N. D., Park, D. J., Gallagher,  
326 G. R., Vogels, C. B. F., & Grubaugh, N. (2022). Monkeypox virus multiplexed PCR amplicon  
327 (PrimalSeq) V.2. *Protocols.io*, 1–6.
- 328 Ebbert, M. T. W., Jensen, T. D., Jansen-West, K., Sens, J. P., Reddy, J. S., Ridge, P. G., Kauwe, J. S. K.,  
329 Belzil, V., Pregent, L., Carrasquillo, M. M., Keene, D., Larson, E., Crane, P., Asmann, Y. W., Ertekin-  
330 Taner, N., Younkin, S. G., Ross, O. A., Rademakers, R., Petrucelli, L., & Fryer, J. D. (2019). Systematic  
331 analysis of dark and camouflaged genes reveals disease-relevant genes hiding in plain sight.  
332 *Genome Biology*, 20(1), 97. <https://doi.org/10.1186/s13059-019-1707-2>
- 333 Gener, A. R. (2022). Anticipating HIV drug resistance with appropriate sequencing methods. *AIDS*, 36(1).  
334 [https://journals.lww.com/aidsonline/Fulltext/2022/01010/Anticipating\\_HIV\\_drug\\_resistance\\_with  
335 \\_appropriate.16.aspx](https://journals.lww.com/aidsonline/Fulltext/2022/01010/Anticipating_HIV_drug_resistance_with_appropriate.16.aspx)
- 336 Gener, A. R., Zou, W., Foley, B. T., Hyink, D. P., & Klotman, P. E. (2021). Reference plasmid pHXB2\_D is an  
337 HIV-1 molecular clone that exhibits identical LTRs and a single integration site indicative of an HIV  
338 provirus. *BioRxiv*, 611848. <https://doi.org/10.1101/611848>
- 339 Gigante, C. M., Korber, B., Seabolt, M. H., Wilkins, K., Davidson, W., Rao, A. K., Zhao, H., Hughes, C. M.,  
340 Minhaj, F., Waltenburg, M. A., Theiler, J., Smole, S., Gallagher, G. R., Blythe, D., Myers, R., Schulte,  
341 J., Stringer, J., Lee, P., Mendoza, R. M., ... Li, Y. (2022). Multiple lineages of Monkeypox virus  
342 detected in the United States, 2021-2022. *BioRxiv*, 2022.06.10.495526.  
343 <https://doi.org/10.1101/2022.06.10.495526>
- 344 Gubser, C., & Smith, G. L. (2002). The sequence of camelpox virus shows it is most closely related to  
345 variola virus, the cause of smallpox. *Journal of General Virology*, 83(4), 855–872.  
346 <https://doi.org/10.1099/0022-1317-83-4-855>
- 347 Happi, A. C., Adetifa, I., Mbala, P., & Njouom, R. (2022). *Urgent need for a non-discriminatory and non-  
348 stigmatizing nomenclature for monkeypox virus Urgent need for a non-discriminatory and non-  
349 stigmatizing nomenclature for monkeypox virus*. 1–10.  
350 <https://doi.org/10.1371/journal.pbio.3001769>
- 351 Kerr, P. J., Ghedin, E., DePasse, J. V., Fitch, A., Cattadori, I. M., Hudson, P. J., Tschärke, D. C., Read, A. F.,

- 352 & Holmes, E. C. (2012). Evolutionary History and Attenuation of Myxoma Virus on Two Continents.  
353 *PLoS Pathogens*, 8(10). <https://doi.org/10.1371/journal.ppat.1002950>
- 354 Krebs, F., Hogan, T., & Quiterio, S. (2001). Lentiviral LTR-directed expression, sequence variation, and  
355 disease pathogenesis. *HIV Sequence ...*, i, 29–70.  
356 <http://www.hiv.lanl.gov/content/sequence/HIV/COMPENDIUM/2001/partI/Wigdahl.pdf>
- 357 Kugelman, J. R., Johnston, S. C., Mulembakani, P. M., Kisalu, N., Lee, M. S., Koroleva, G., McCarthy, S. E.,  
358 Gestole, M. C., Wolfe, N. D., Fair, J. N., Schneider, B. S., Wright, L. L., Huggins, J., Whitehouse, C. A.,  
359 Wemakoy, E. O., Muyembe-Tamfum, J. J., Hensley, L. E., Palacios, G. F., & Rimoin, A. W. (2014).  
360 Genomic variability of monkeypox virus among humans, Democratic Republic of the Congo.  
361 *Emerging Infectious Diseases*, 20(2), 232–239. <https://doi.org/10.3201/eid2002.130118>
- 362 Li, H. (2018). Minimap2: pairwise alignment for nucleotide sequences. *Bioinformatics*, 34(18), 3094–  
363 3100. <https://doi.org/10.1093/bioinformatics/bty191>
- 364 Mauldin, M. R., McCollum, A. M., Nakazawa, Y. J., Mandra, A., Whitehouse, E. R., Davidson, W., Zhao, H.,  
365 Gao, J., Li, Y., Doty, J., Yinka-Ogunleye, A., Akinpelu, A., Aruna, O., Naidoo, D., Lewandowski, K.,  
366 Afrough, B., Graham, V., Aarons, E., Hewson, R., ... Reynolds, M. G. (2022). Exportation of  
367 Monkeypox Virus From the African Continent. *The Journal of Infectious Diseases*, 225(8), 1367–  
368 1376. <https://doi.org/10.1093/infdis/jiaa559>
- 369 Robinson, J. T., Thorvaldsdóttir, H., Winckler, W., Guttman, M., Lander, E. S., Getz, G., & Mesirov, J. P.  
370 (2011). Integrative genomics viewer. *Nat Biotechnol*, 29(1), 24–26.  
371 <https://doi.org/10.1038/nbt0111-24>
- 372 Shendure, J., Balasubramanian, S., Church, G. M., Gilbert, W., Rogers, J., Schloss, J. A., & Waterston, R. H.  
373 (2017). DNA sequencing at 40: Past, present and future. *Nature*, 550(7676), 345–353.  
374 <https://doi.org/10.1038/nature24286>
- 375 Starcich, B., Ratner, L., Josephs, S. F., Okamoto, T., Robert, C., & Wong-staal, F. (1985). Characterization  
376 of Long Terminal Repeat Sequences of HTLV-III. *Science*, 227(4686), 538–540.  
377 <http://www.jstor.org/stable/1694175>
- 378 Stark, R., Grzelak, M., & Hadfield, J. (2019). RNA sequencing: the teenage years. *Nature Reviews*  
379 *Genetics*, 20(11), 631–656. <https://doi.org/10.1038/s41576-019-0150-2>
- 380 ViralZone. (2022). *Monkeypox virus genome*. Poxvirus Resource. <https://viralzone.expasy.org/9959>
- 381 WHO. (2022). *Monkeypox outbreak 2022*. <https://www.who.int/emergencies/situations/monkeypox-oubreak-2022>
- 382
- 383 Wysoker, A., Fennell, T., Marth, G., Abecasis, G., Ruan, J., Li, H., Durbin, R., Homer, N., & Handsaker, B.  
384 (2009). The Sequence Alignment/Map format and SAMtools. *Bioinformatics*, 25(16), 2078–2079.  
385 <https://doi.org/10.1093/bioinformatics/btp352>
- 386
- 387
